# Supplementary material for: The Secret Life of the Inhibitor of Virus Replication
Source: MDPI journal article supplement (doi:10.3390/v14122782), 2022-12-14
Supplement: s1 [file s1]

## *Supplementary Table and Figures*

# **The Secret Life of the Inhibitor of Virus Replication**

**Peter Palukaitis <sup>1,\*</sup>, Masoud Akbarimotlagh <sup>2</sup>, Eseul Baek <sup>1</sup>, and Ju-Yeon Yoon <sup>3,4,\*</sup>**

<sup>1</sup> Department of Horticulture Sciences, Seoul Women's University, Seoul 01797, Republic of Korea

<sup>2</sup> Plant Pathology Department, Faculty of Agriculture, Tarbiat Modares University, Tehran 14115-111, Iran

<sup>3</sup> Department of Plant Protection and Quarantine, Jeonbuk National University, Jeonju 54896, Republic of Korea

<sup>4</sup> Department of Agricultural Convergence Technology, Jeonbuk National University, Jeonju 54896, Republic of Korea

\* Correspondence: scripath1@yahoo.co.uk (P.P.); juyeon74@gmail.com (J.-Y.Y.); Tel.: +82-63-270-4188 (J.-Y.Y.)

Table S1. Oligonucleotide primers used in reverse-transcription-polymerase chain reaction amplification for the yeast two-hybrid assay

| Name    | Accession No. | Size (bp) | Primer sequence                                                                                                                                             | Reference |
|---------|---------------|-----------|-------------------------------------------------------------------------------------------------------------------------------------------------------------|-----------|
| CMV-1a  | D00356        | 2982      | F: 5'-gggg-acaagttgtacaaaaagcaggctcc <u>atggcgacgtcctcggtcaa</u> -3' <sup>a,b</sup><br>R: 5'-gggg-accactttgtacaagaaagctgggtc <u>taagcacgagcaacacatt</u> -3' | [53]      |
| CMV-2a  | D00355        | 2574      | F: 5'-gggg-acaagttgtacaaaaagcaggctcc <u>atggctttccctgccccgc</u> -3'<br>R: 5'-gggg-accactttgtacaagaaagctgggtc <u>agactcgggtaactccgc</u> -3'                  | [54]      |
| N gene  | U15605        | 3432      | F: 5'-gggg-acaagttgtacaaaaagcaggctcc <u>catggcatcttcttcttctc</u> -3'<br>R: 5'-gggg-accactttgtacaagaaagctgggtc <u>agcaaaggcgaagatgtt</u> -3'                 | [55]      |
| HSP90   | AY519499      | 2100      | F: 5'-gggg-acaagttgtacaaaaagcaggctcc <u>atggcgatacagagacgtt</u> -3'<br>R: 5'-gggg-accactttgtacaagaaagctgggt <u>tagtcaacctctccatct</u> -3'                   | None      |
| RAR1    | AF480487      | 666       | F: 5'-gggg-acaagttgtacaaaaagcaggctcc <u>atggagagacttcgttgcca</u> -3'<br>R: 5'-gggg-accactttgtacaagaaagctgggt <u>taggacgctgggctggcgt</u> -3'                 | [56]      |
| MYB1    | U72762        | 837       | F: 5'-gggg-acaagttgtacaaaaagcaggctcc <u>atggtagagctcctgttg</u> -3'<br>R: 5'-gggg-accactttgtacaagaaagctgggtc <u>aaaattctgtaattctg</u> -3'                    | [27]      |
| IVR     | AJ009684      | 600       | F: 5'-gggg-acaagttgtacaaaaagcaggcttc <u>atgaatcgacctgaagctgc</u> -3'<br>R: 5'-gggg-accactttgtacaagaaagctgggtc <u>ataaaagctcagcctctt</u> -3'                 | [28]      |
| TMV-Hel | NC_001367     | 1341      | F: 5'-gggg-acaagttgtacaaaaagcaggctcc <u>atggagatagagtctttaga</u> -3'<br>R: 5'-gggg-accactttgtacaagaaagctgggtc <u>tattgtgtcctgcatcga</u> -3'                 | [57]      |

<sup>a</sup> Underlined characters are start and stop codons.

<sup>b</sup> Bold characters are recombination sites for using the Gateway system.

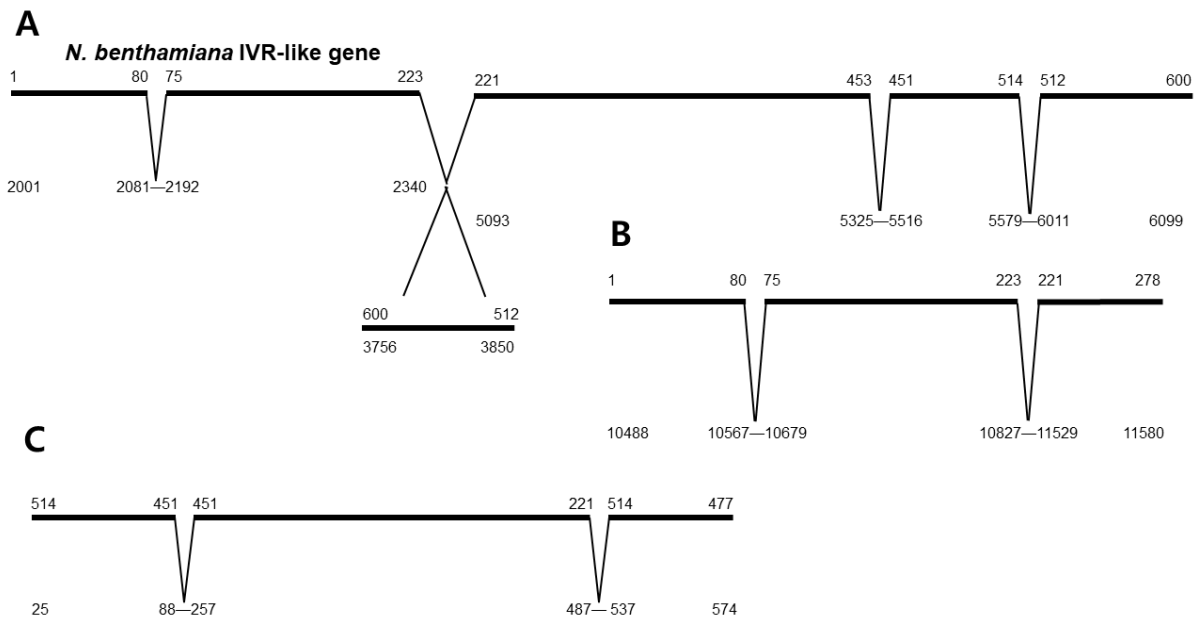

**Figure S1.** Genome organization of IVR-like genes in *Nicotiana benthamiana*. Genomic sequences and mRNA-derived sequences that contain IVR-like sequences were compared with the sequence of the tobacco IVR coding region, allowing the positions of exons and introns to be determined (A). In *N. benthamiana*, alternate copies of partial or complete exons were found, either downstream of the complete IVR copy (B), upstream of the complete copy (C), or within an intron of the complete copy (A); those exons or fragments in either the intron in (A) or upstream in (C), were in antisense orientation. Numbers above the “chromosome line” represent the transcripts coordinates, while numbers below the lines or introns represent the genome sequence coordinates from specific genomic scaffolds.

**A**

MEVPKEQIAT LIEHGLYDSA EMLGCFLVSS PTVSAETSPQ LKAENLILLG DALFHQREHR 60  
RAIHTYKQAL HHYTRIPKQS SGISRSSL SLSTRSSVNASS ISAINENEVR FKIASHFAL 120  
NETKAAIAEM ESVKTRSLM NILMAKLHRN SGYNRGAI AFYKECLRQCPY VLEAVIGLAE 180  
LGVS AKDIIS SFTQTSNRSA KVS LDQIDPT RWLQRYVEAQ CCVASHAYKG ALELFAELLQ 240  
RFPNNVHLLT ETAKVEAIIG KNDEAIMRFE KVRSIDPYTL TS 282

**B**

MDEYAMLLQI KCDYSRLNKL VHDLLSVDHT RAEVFVALSV LWERKDARTA LSYAEKSIRV 60  
MDEYAMLLQI KCDYSRLNKL VHDLLSVDHT RAEVFVALSV LWERKDARTA LSYAEKSIRV 342  
  
DERHIPGYIM KGNLLLQAKR PEAAAIAFRA AQNLRSDLRS YQGLVHSYLA FGKTKEALYT 120  
DERHIPGYIM KGNLLLQAKR PEAAAIAFRA AQNLRSDLRS YQGLVHSYLA FGKTKEALYT 402  
  
AREAMNAMPQ SAKALKLVGD VHAFTSSGRE KAKKFYESGL RLEPGYLGAV LALAEHLME 180  
AREAMNAMPQ SAKALKLVGD VHAFTSSGRE KAKKFYESGL RLEPGYLGAV LALAEHLME 462  
  
GRNGDAVSLL ERYLKDYADD SLHV KLAQVF AATNMLQDSL SHFQAALRIN PQNEAAKKGL 240  
GRNGDAVSLL ERYLKDYADD SLHV KLAQVF AATNMLQDSL SHFQAALRIN PQNEAAKKGL 522  
  
DRLEKQMKGI DPDATDENDE NDVEDVDGDT EEAELM (276)  
DRLEKQMKGI DPDATDENDE NDVEDVDGDT EEAELM (558)

**Figure S2.** Comparison of an unknown protein-encoding gene fragment of *Arabidopsis thaliana* with the sequence encoding the full-length Arabidopsis anaphase-promoting complex subunit 7 (APC7). (A) The N-terminal 282 amino acids (aa) sequence of the 558-aa APC7 protein (NP\_850309; 16 SEP 2003), external to the C-terminal co-linear fragment alignment. (B) Comparison of the partial 276-aa APC7 protein sequence (derived from At2g39090; 02 FEB 2001) (upper line of each paired lines) with the C-terminal 276-aa APC7 protein sequence of the 558-aa APC7 protein (lower line of each paired lines). The two sequences are identical in the regions of overlap.
